# Supplementary material for: Single-Cell Atlas Reveals the Hemocyte Subpopulations and Stress Responses in Asian Giant Softshell Turtle during Hibernation
Source: MDPI journal article supplement (doi:10.3390/biology12070994), 2023-07-12
Supplement: s1 [file s1]

# **Single-cell atlas reveals the hemocyte subpopulations and stress responses in Asian giant softshell turtle during hibernation**

Xiaoyou Hong<sup>1</sup>, Yakun Wang<sup>1</sup>, Kaikuo Wang<sup>1,2</sup>, Chengqing Wei<sup>1</sup>, Wei Li<sup>1</sup>, Lingyun

Yu<sup>1</sup>, Haoyang Xu<sup>1,2</sup>, Junxian Zhu<sup>1,2</sup>, Xinping Zhu<sup>1,2\*</sup>, Xiaoli Liu<sup>1\*</sup>

<sup>1</sup>Key Laboratory of Tropical and Subtropical Fishery Resources Application and Cultivation, Ministry of Agriculture and Rural Affairs, Pearl River Fisheries Research Institute, Chinese Academy of Fishery Sciences, Guangzhou 51038, China

<sup>2</sup>College of Life Science and Fisheries, Shanghai Ocean University, Shanghai 201306, China,

## **\*Correspondence:**

Dr. Xiaoli Liu, liu\_xiaoli1988@126.com, +86-020-81174522

Dr. Xinping Zhu, zhuxinping\_1964@163.com, +86-020-81537378

## Supplementary figures and tables

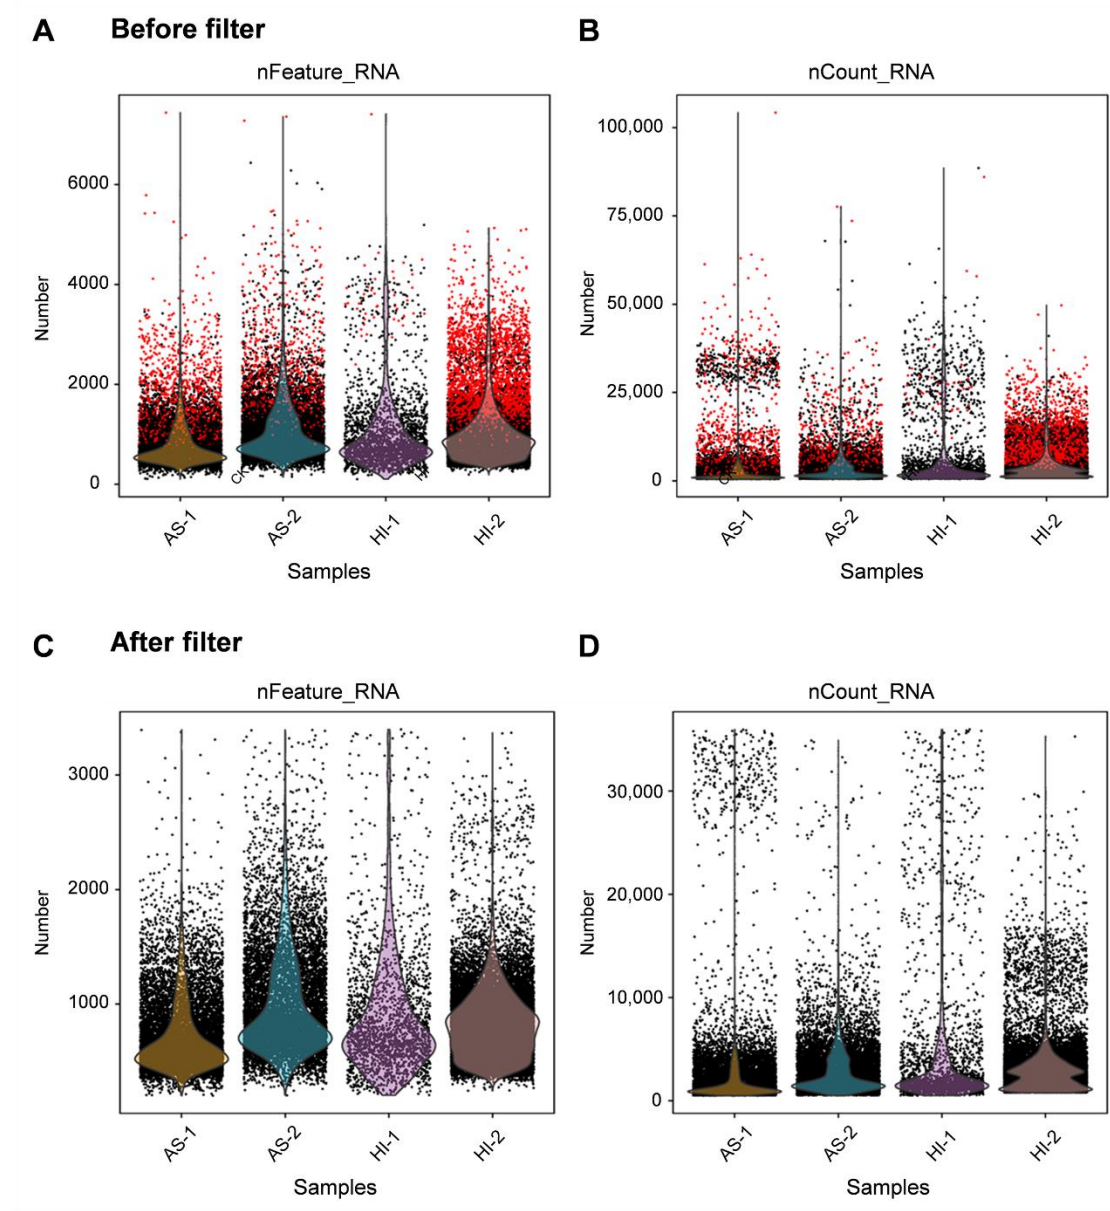

Figure S1. Information of scRNA-seq data quality control. (A) Cell number of *P. cantorii* hemocytes before quality control. (B). Count number of *P. cantorii* hemocytes before quality control. (C) Cell number of *P. cantorii* hemocytes after quality control. (D). Count number of *P. cantorii* hemocytes after quality control. NS and HI represent hemocytes of normal state and hibernation period, respectively.

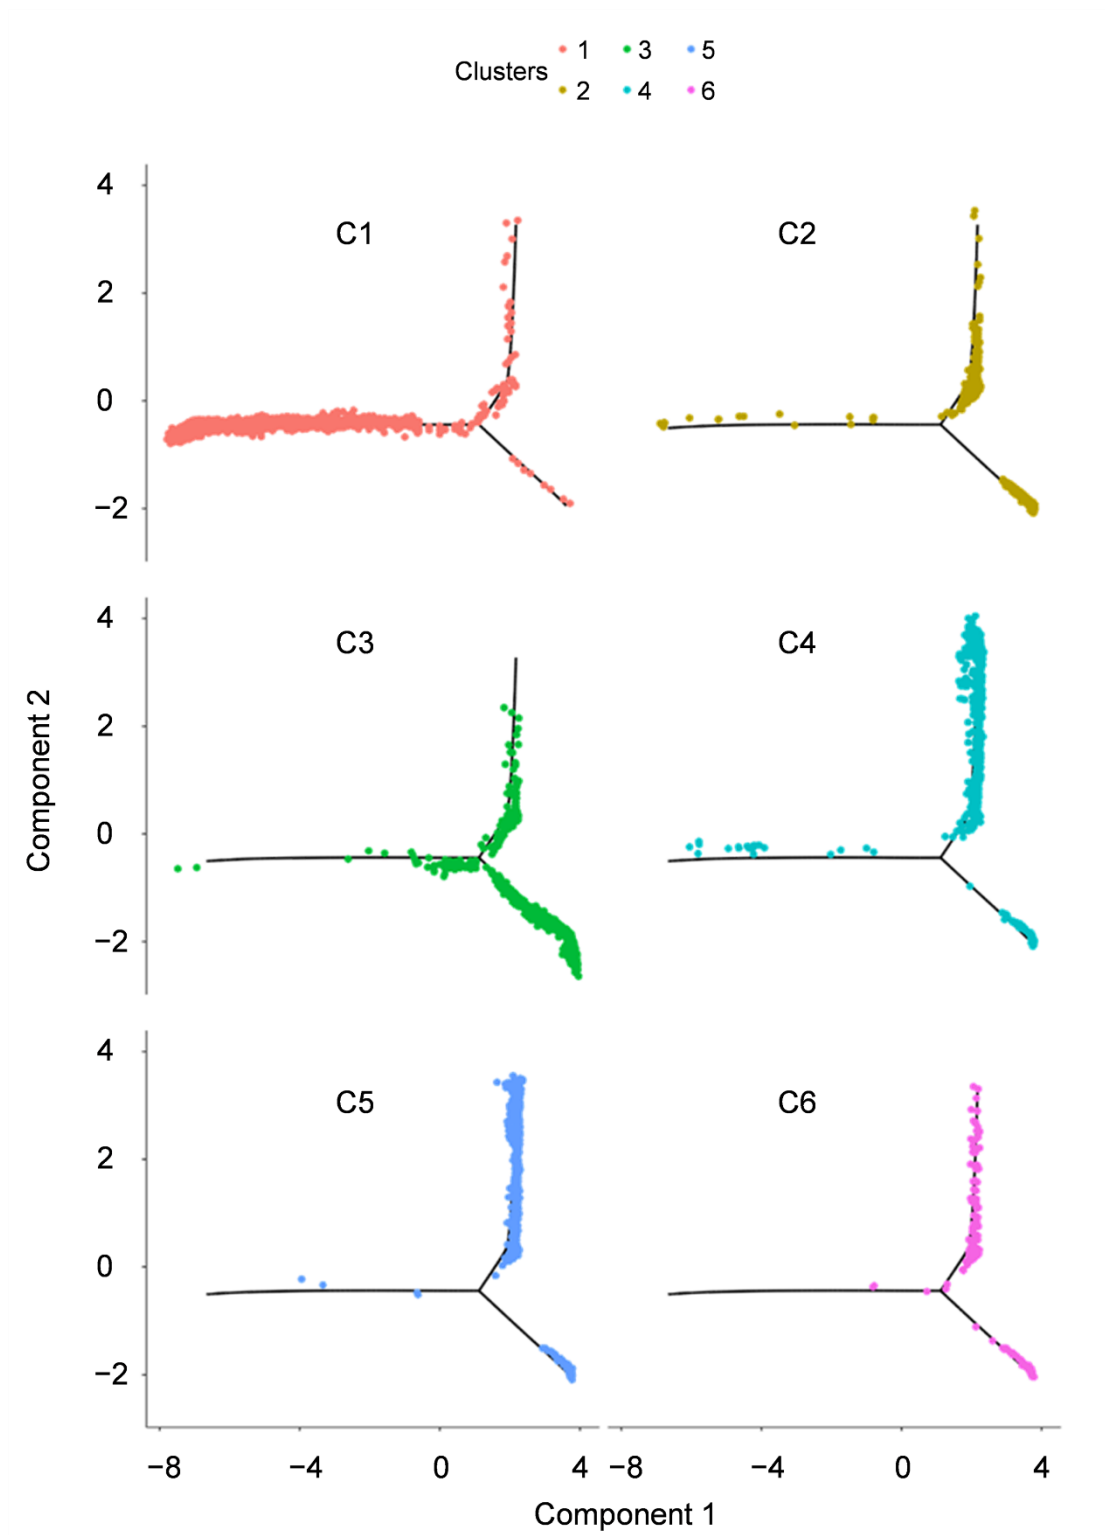

Figure S2. The subclusters of *P. cantorii* hemocytes distributed over the pseudo-time differentiation trajectory.

Table S1. Statistical analysis of cell data in each sample before and after filtration.

| Sample | Before<br>filtering<br>number | After<br>filtering<br>number | Before<br>filtering<br>median<br>UMI per<br>cell | After<br>filtering<br>median<br>UMI per<br>cell | Before<br>filtering<br>median<br>genes per<br>cell | After<br>filtering<br>median<br>genes per<br>cell |
|--------|-------------------------------|------------------------------|--------------------------------------------------|-------------------------------------------------|----------------------------------------------------|---------------------------------------------------|
| AS     | 12,540                        | 11,262                       | 1,652                                            | 1,488                                           | 763                                                | 723                                               |
| HI     | 13,547                        | 11,104                       | 2,507                                            | 2,251                                           | 827                                                | 765                                               |

Table S2. Statistical table of classification results of cell subsets

| Cluster | AS             | HI             |
|---------|----------------|----------------|
| C1      | 14691 (65.23%) | 2180 (9.82%)   |
| C2      | 140 (0.62%)    | 10285 (46.31%) |
| C3      | 1096 (4.87%)   | 6768 (30.48%)  |
| C4      | 4972 (22.08%)  | 1516 (6.83%)   |
| C5      | 1591 (7.06%)   | 1261 (5.68%)   |
| C6      | 33 (0.15%)     | 198 (0.89%)    |

Table S4. The expression level of bipotent progenitor or stem-like cell signatures *zebl* and *itga6* in hemocytes of normal state.

| GeneID       | Gene<br>Name | C1    | C2    | C3    | C4    | C5    | C6    |
|--------------|--------------|-------|-------|-------|-------|-------|-------|
| Pca02G014240 | <i>zebl</i>  | 0.049 | 0.810 | 0.501 | 1.830 | 1.271 | 0.840 |
| Pca07G003140 | <i>itga6</i> | 0.003 | 0.009 | 0.008 | 0.049 | 0.015 | 0.012 |
